# Supplementary material for: Gut mycobiome and its interaction with diet, gut bacteria and alzheimer's disease markers in subjects with mild cognitive impairment: A pilot study
Source: PubMed Central journal article supplement (PMC7475073; doi:10.1016/j.ebiom.2020.102950), 2020-08-30
Supplement: mmc1.pdf [file mmc1.pdf]

# Supplementary material

## **Gut mycobiome and its interaction with host diet, gut bacteria and Alzheimer's disease biomarkers in subjects with mild cognitive impairment: a pilot study**

**Ravinder Nagpal<sup>1,2</sup>, Bryan J. Neth<sup>3,4</sup>, Shaohua Wang<sup>1,2</sup>, Sidharth P. Mishra<sup>1,2</sup>, Suzanne Craft<sup>3,\*</sup>, Hariom Yadav<sup>1,2,\*</sup>**

*<sup>1</sup>Department of Internal Medicine-Molecular Medicine, <sup>2</sup>Department of Microbiology and Immunology, Wake Forest School of Medicine, Winston-Salem, NC, USA.*

*<sup>3</sup>Department of Gerontology and Geriatric Medicine, Wake Forest School of Medicine, Winston-Salem, NC, USA.*

*<sup>4</sup>Department of Neurology, Mayo Clinic, Rochester, MN, USA*

\*Correspondence to:

Hariom Yadav, PhD, Assistant Professor, Department of Internal Medicine-Molecular Medicine, Department of Microbiology and Immunology, Center for Diabetes, Obesity and Metabolism, Wake Forest School of Medicine, Wake Forest Biotech Place, Suite 2E-034, 575 Patterson Ave., Winston-Salem, NC 27101, USA. [hyadav@wakehealth.edu](mailto:hyadav@wakehealth.edu)

Suzanne Craft, PhD, Professor, Gerontology and Geriatric Medicine, J. Paul Sticht Center on Aging, Roena B. Kulynych Center for Memory and Cognition Research, Wake Forest School of Medicine, Winston-Salem, NC 27101, USA.

[suzcraft@wakehealth.edu](mailto:suzcraft@wakehealth.edu)

# Suppl. Fig. 1

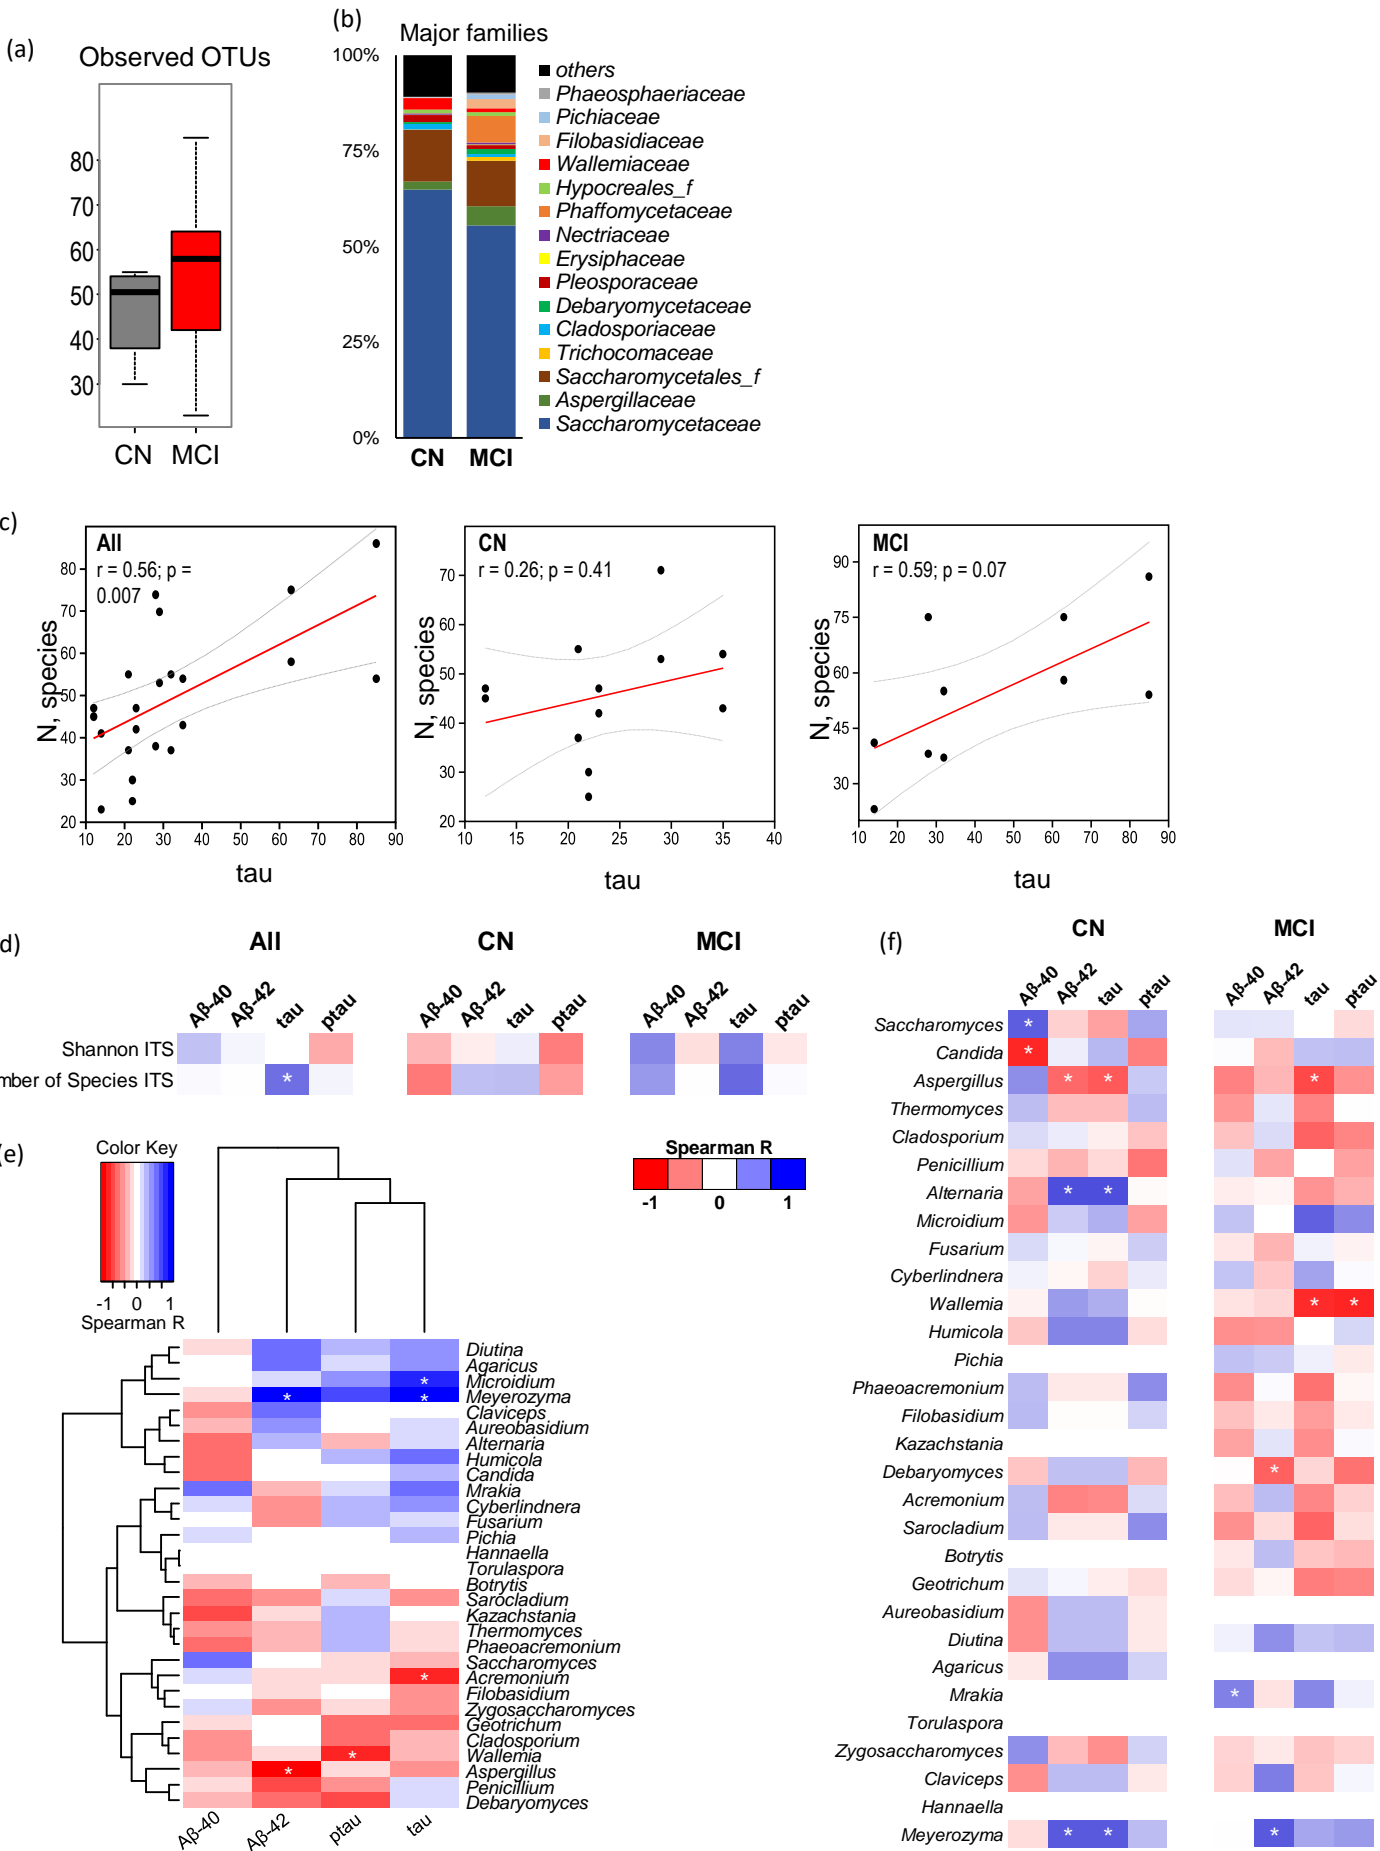

# Suppl. Fig. 2

(a) Post-MMKD

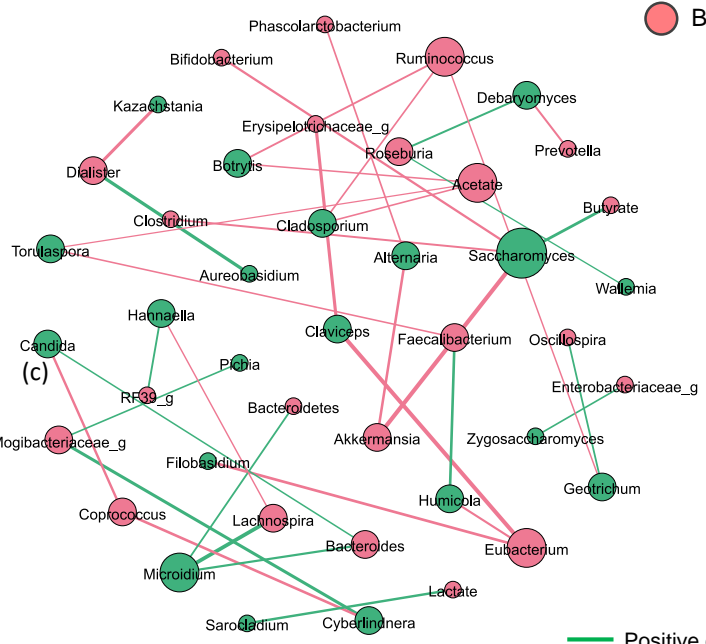

(b) Post-AHAD

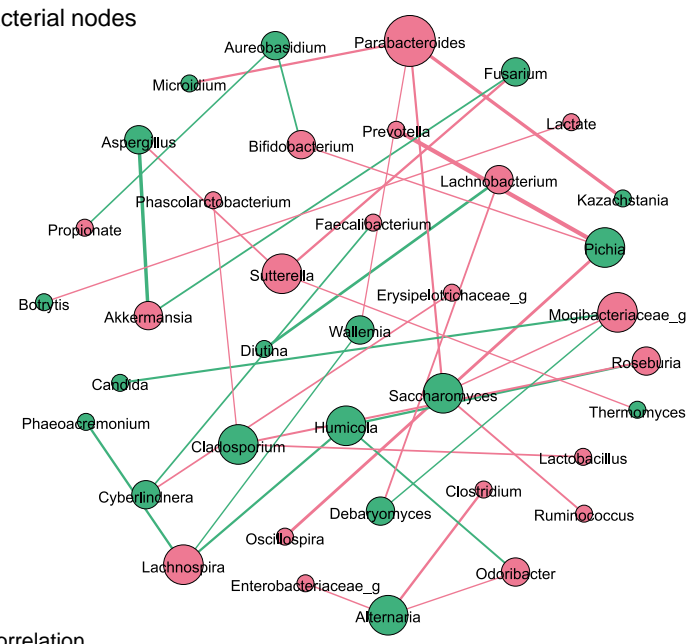

● Fungal nodes  
● Bacterial nodes

— Positive correlation  
— Negative correlation
